# Supplementary material for: N-Doped Carbon/CeO2 Composite as a Biomimetic Catalyst for Antibacterial Application
Source: MDPI journal article supplement (doi:10.3390/ijms24032445), 2023-01-26
Supplement: s1 [file s1]

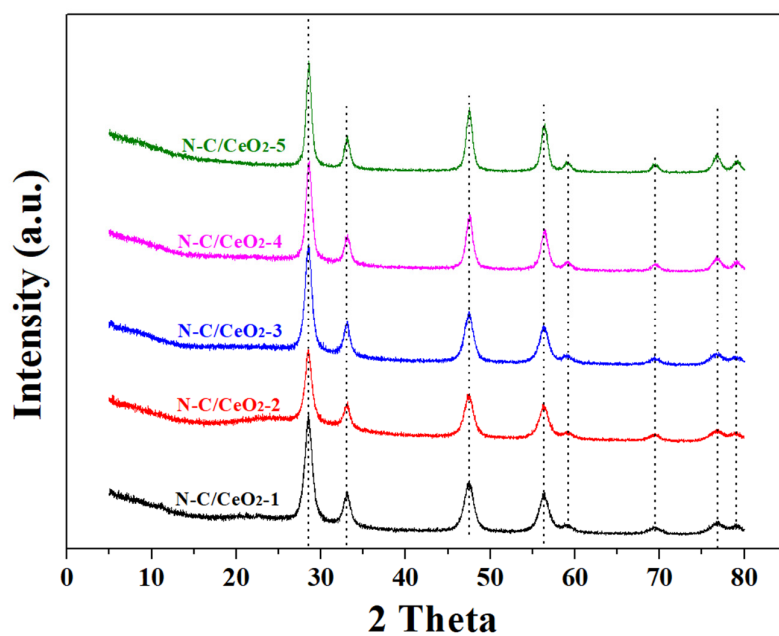

**Figure S1.** XRD pattern of the different N-C/CeO<sub>2</sub> composites. N-C/CeO<sub>2</sub>-1, N-C/CeO<sub>2</sub>-2, N-C/CeO<sub>2</sub>-3, N-C/CeO<sub>2</sub>-4 and N-C/CeO<sub>2</sub>-5 were synthesized by using melamine and Ce(NO<sub>3</sub>)<sub>3</sub>•6H<sub>2</sub>O with the mass ratio of 6:1, 3:1, 2:1, 1:1 and 1:2, respectively.

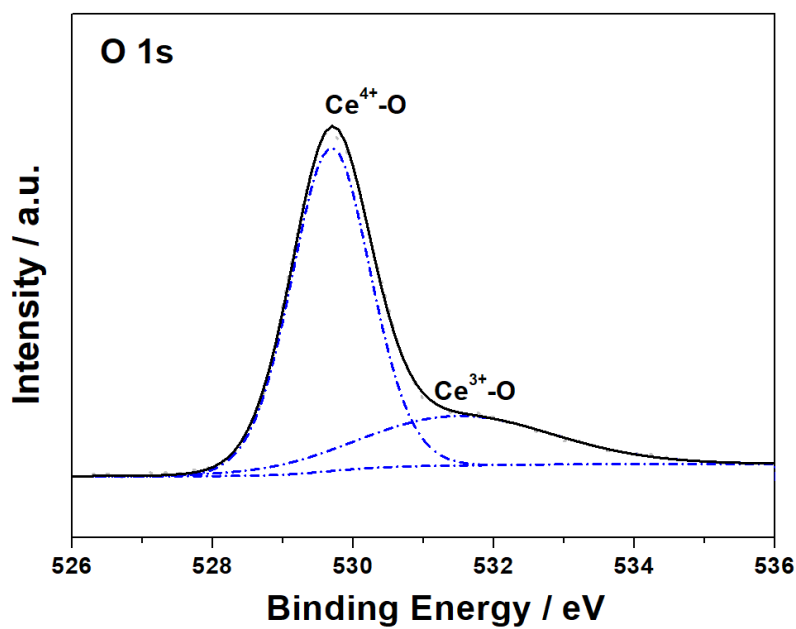

**Figure S2.** XPS pattern of N-C/CeO<sub>2</sub> composite O 1s.

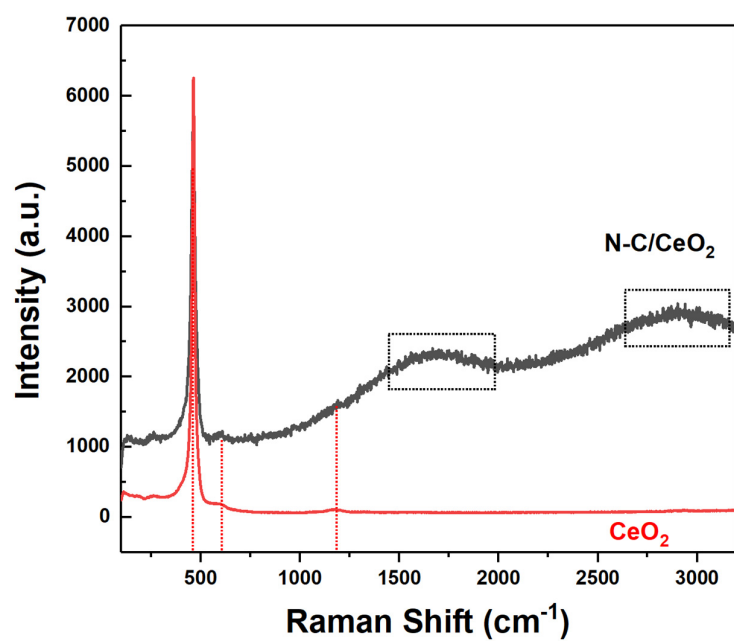

Figure S3. Raman spectra of CeO<sub>2</sub> and N-C/CeO<sub>2</sub> in the range 200~3200 cm<sup>-1</sup>.

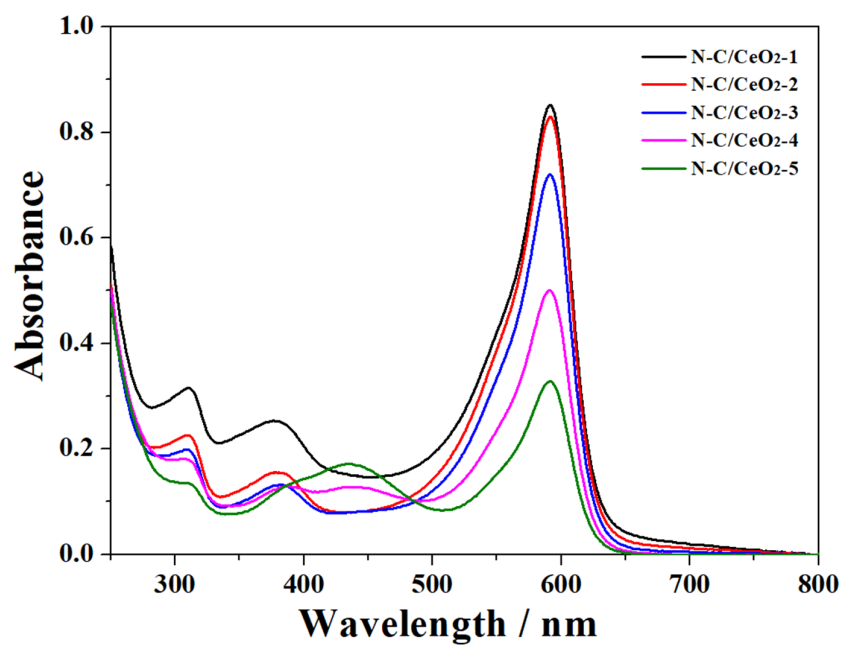

Figure S4. Absorbance spectra of reaction solutions catalyzed by the different N-C/CeO<sub>2</sub> composites.

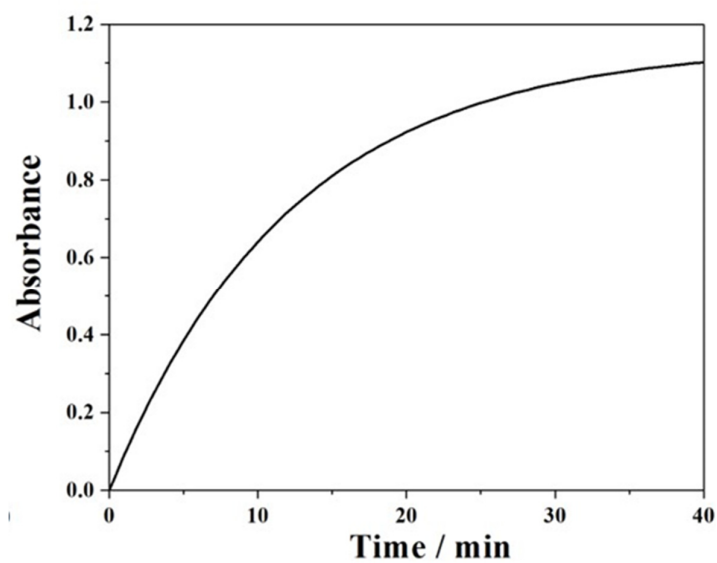

**Figure S5.** Time-dependent kinetics spectra showing the kinetics of the oxidative bromination of PR catalyzed by N-C/CeO<sub>2</sub> composite (40 min, 23–25 °C).

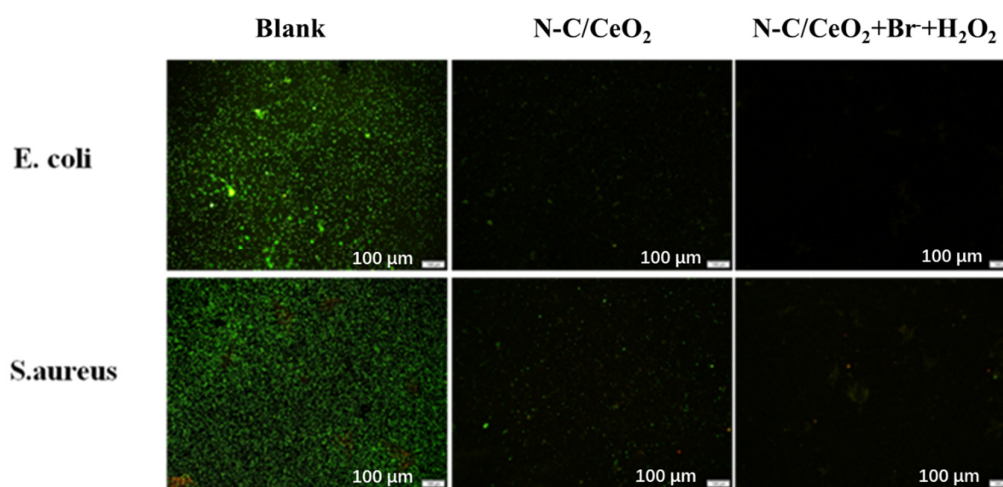

**Figure S6.** Live/dead staining images of *E. coli* and *S. aureus* treated with titanium plate in different systems: blank, N-C/CeO<sub>2</sub> and N-C/CeO<sub>2</sub> + Br<sup>-</sup> + H<sub>2</sub>O<sub>2</sub>.

**Table S1.** The antibacterial of CeO<sub>2</sub> based materials.

| Catalysts                                                | Bacteria       | Bacterial attachment (%) | Reference                                                        |
|----------------------------------------------------------|----------------|--------------------------|------------------------------------------------------------------|
| CeO <sub>2-x</sub> NRs                                   | <i>E. coli</i> | ~37                      | ACS Appl. Mater. Interfaces 2018, 10, 44722–44730                |
| CeO <sub>2-x</sub> nanorods with different aspect ratios | <i>E. coli</i> | ~42%                     | ACS Sustainable Chemistry & Engineering 2020, 6744-6752          |
| CeO <sub>2</sub> @C                                      | <i>E. coli</i> | ~2.5%                    | Colloids and Surfaces A: Physicochemical and Engineering Aspects |
| N-C/CeO <sub>2</sub>                                     | <i>E. coli</i> | ~0.24%                   | This work                                                        |

## References

1. Hu, M.; Korschelt, K.; Viel, M.; Wiesmann, N.; Kappl, M.; Brieger, J.; Landfester, K.; Therien-Aubin, H.; Tremel, W., Nanozymes in nanofibrous mats with haloperoxidase-like activity to combat biofouling. *ACS Applied Materials & Interfaces* **2018**, 10, (51), 44722-44730.
2. He, X.; Tian, F.; Chang, J.; Bai, X.; Yuan, C.; Wang, C.; Neville, A., Haloperoxidase mimicry by CeO<sub>2-x</sub> nanorods of different aspect ratios for antibacterial performance. *ACS Sustainable Chemistry & Engineering* **2020**, 8, (17), 6744-6752.
3. Wang, N.; Li, W.; Ren, Y.; Duan, J.; Zhai, X.; Guan, F.; Wang, L.; Hou, B., Investigating the properties of nano core-shell CeO<sub>2</sub>@C as haloperoxidase mimicry catalyst for antifouling applications. *Colloids and Surfaces A: Physicochemical and Engineering Aspects* **2021**, 608, 125592.
